# Supplementary material for: Characteristics of admissions and variations in the use of basic investigations, treatments and outcomes in Kenyan hospitals within a new Clinical Information Network
Source: HighWire-hosted journal article supplement (doi:10.1136/archdischild-2015-309269), 2015-12-10
Supplement: archdischild-2015-309269supp_table2.pdf [file archdischild-2015-309269supp_table2.pdf]

**Webtable 2: Treatment of common childhood illnesses in admissions to CIN hospitals**

| <b>Indicator</b>                                                           | <b>H1</b>              |
|----------------------------------------------------------------------------|------------------------|
| <b>Clinician's diagnosis of malaria</b>                                    | <b>1588/2188 (73%)</b> |
| Proportion treated with Artesunate                                         | 404/1588 (25%)         |
| Proportion treated with quinine                                            | 1079/1588 (68%)        |
| Proportion starting treatment on oral ACT                                  | 56/1588 (4%)           |
| <b>Clinician's diagnosis of meningitis</b>                                 | <b>68/2188 (3%)</b>    |
| Proportion treated with Penicillin and Chloramphenicol                     | 0/68 (0%)              |
| Proportion treated with Ceftriaxone alone                                  | 53/68 (78%)            |
| <b>Clinician's diagnosis of Severe Acute Malnutrition (not meningitis)</b> | <b>127/2188 (6%)</b>   |
| Proportion treated with F75 or F100 or RUTF                                | 102/127 (80%)          |
| Proportion treated with Penicillin & Gentamicin                            | 110/127 (87%)          |
| <b>Pneumonia (excluding meningitis &amp; severe acute malnutrition)</b>    | <b>598/2188 (27%)</b>  |
| Proportion treated with Penicillin & Gentamicin                            | 207/598 (35%)          |
| Proportion treated with Penicillin alone                                   | 309/598 (52%)          |
| Proportion starting treated with Amoxicillin                               | 42/598 (7%)            |
| <b>Clinician's diagnosis of diarrhoea / dehydration</b>                    | <b>519/2188 (24%)</b>  |
| Proportion treated with Zinc                                               | 401/519 (77%)          |

| H2                    | H3                     | H4                    | H5                    | H6                    |
|-----------------------|------------------------|-----------------------|-----------------------|-----------------------|
| <b>209/2193 (10%)</b> | <b>3204/3659 (88%)</b> | <b>8/1159 (1%)</b>    | <b>88/1590 (6%)</b>   | <b>4/1041 (0%)</b>    |
| 62/209 (30%)          | 964/3204 (30%)         | 1/8 (12%)             | 0/88 (0%)             | 2/4 (50%)             |
| 3/209 (1%)            | 2020/3204 (63%)        | 2/8 (25%)             | 3/88 (3%)             | 0/4 (0%)              |
| 14/208 (7%)           | 39/3203 (1%)           | 1/8 (12%)             | 1/87 (1%)             | 2/4 (50%)             |
| <b>354/2193 (16%)</b> | <b>782/3659 (21%)</b>  | <b>197/1159 (17%)</b> | <b>169/1590 (11%)</b> | <b>83/1041 (8%)</b>   |
| 247/354 (70%)         | 4/782 (1%)             | 142/197 (72%)         | 95/169 (56%)          | 71/83 (86%)           |
| 30/354 (8%)           | 651/782 (83%)          | 18/197 (9%)           | 22/169 (13%)          | 0/83 (0%)             |
| <b>359/2193 (16%)</b> | <b>121/3659 (3%)</b>   | <b>72/1159 (6%)</b>   | <b>80/1590 (5%)</b>   | <b>127/1041 (12%)</b> |
| 213/359 (59%)         | 48/121 (40%)           | 18/72 (25%)           | 104/80 (130%)         | 118/127 (93%)         |
| 211/359 (59%)         | 64/121 (53%)           | 30/72 (42%)           | 58/80 (72%)           | 98/127 (77%)          |
| <b>896/2193 (41%)</b> | <b>799/3659 (22%)</b>  | <b>538/1159 (46%)</b> | <b>767/1590 (48%)</b> | <b>444/1041 (43%)</b> |
| 175/896 (20%)         | 259/799 (32%)          | 148/538 (28%)         | 380/767 (50%)         | 153/444 (34%)         |
| 463/896 (52%)         | 268/799 (34%)          | 268/538 (50%)         | 246/767 (32%)         | 268/444 (60%)         |
| 33/896 (4%)           | 110/799 (14%)          | 7/538 (1%)            | 7/767 (1%)            | 2/444 (0%)            |
| <b>724/2193 (33%)</b> | <b>1066/3659 (29%)</b> | <b>379/1159 (33%)</b> | <b>392/1590 (25%)</b> | <b>447/1041 (43%)</b> |
| 520/724 (72%)         | 635/1066 (60%)         | 237/379 (63%)         | 213/392 (54%)         | 396/447 (89%)         |

| H7                     | H8                     | H9                    | H10                   | H11                   |
|------------------------|------------------------|-----------------------|-----------------------|-----------------------|
| <b>1189/1860 (64%)</b> | <b>1677/2461 (68%)</b> | <b>58/1338 (4%)</b>   | <b>100/1049 (10%)</b> | <b>172/1584 (11%)</b> |
| 125/1189 (11%)         | 1317/1677 (79%)        | 2/58 (3%)             | 70/100 (70%)          | 130/172 (76%)         |
| 896/1189 (75%)         | 25/1677 (1%)           | 6/58 (10%)            | 2/100 (2%)            | 0/172 (0%)            |
| 19/1188 (2%)           | 152/1676 (9%)          | 15/57 (26%)           | 1/100 (1%)            | 3/172 (2%)            |
| <b>52/1860 (3%)</b>    | <b>92/2461 (4%)</b>    | <b>188/1338 (14%)</b> | <b>212/1049 (20%)</b> | <b>201/1584 (13%)</b> |
| 8/52 (15%)             | 68/92 (74%)            | 15/188 (8%)           | 92/212 (43%)          | 103/201 (51%)         |
| 10/52 (19%)            | 7/92 (8%)              | 85/188 (45%)          | 44/212 (21%)          | 11/201 (5%)           |
| <b>84/1860 (5%)</b>    | <b>162/2461 (7%)</b>   | <b>77/1338 (6%)</b>   | <b>75/1049 (7%)</b>   | <b>275/1584 (17%)</b> |
| 24/84 (29%)            | 141/162 (87%)          | 64/77 (83%)           | 28/75 (37%)           | 47/275 (17%)          |
| 37/84 (44%)            | 103/162 (64%)          | 50/77 (65%)           | 60/75 (80%)           | 203/275 (74%)         |
| <b>417/1860 (22%)</b>  | <b>898/2461 (36%)</b>  | <b>578/1338 (43%)</b> | <b>464/1049 (44%)</b> | <b>693/1584 (44%)</b> |
| 167/417 (40%)          | 559/898 (62%)          | 296/578 (51%)         | 247/464 (53%)         | 450/693 (65%)         |
| 100/417 (24%)          | 256/898 (29%)          | 202/578 (35%)         | 128/464 (28%)         | 108/693 (16%)         |
| 7/417 (2%)             | 21/898 (2%)            | 6/578 (1%)            | 6/464 (1%)            | 10/693 (1%)           |
| <b>526/1860 (28%)</b>  | <b>939/2461 (38%)</b>  | <b>404/1338 (30%)</b> | <b>397/1049 (38%)</b> | <b>549/1584 (35%)</b> |
| 405/526 (77%)          | 772/939 (82%)          | 288/404 (71%)         | 280/397 (71%)         | 150/549 (27%)         |

| <b>H12</b>            | <b>H13</b>             | <b>Median</b> | <b>Range</b> |
|-----------------------|------------------------|---------------|--------------|
| <b>14/1661 (1%)</b>   | <b>1108/1563 (71%)</b> | 10%           | ( 0,88 )     |
| 0/14 (0%)             | 212/1108 (19%)         | 25%           | ( 0,79 )     |
| 0/14 (0%)             | 763/1108 (69%)         | 2%            | ( 0,75 )     |
| 4/13 (31%)            | 68/1099 (6%)           | 6%            | ( 1,50 )     |
| <b>55/1661 (3%)</b>   | <b>217/1563 (14%)</b>  | 13%           | ( 3,21 )     |
| 11/55 (20%)           | 152/217 (70%)          | 51%           | ( 0,86 )     |
| 23/55 (42%)           | 10/217 (5%)            | 12%           | ( 0,83 )     |
| <b>74/1661 (4%)</b>   | <b>56/1563 (4%)</b>    | 6%            | ( 3,17 )     |
| 7/74 (9%)             | 34/56 (61%)            | 59%           | -9,130       |
| 13/74 (18%)           | 46/56 (82%)            | 65%           | ( 18,87 )    |
| <b>679/1661 (41%)</b> | <b>310/1563 (20%)</b>  | 41%           | ( 20,48 )    |
| 82/679 (12%)          | 148/310 (48%)          | 40%           | ( 12,65 )    |
| 222/679 (33%)         | 99/310 (32%)           | 33%           | ( 16,60 )    |
| 219/679 (32%)         | 43/310 (14%)           | 2%            | ( 0,32 )     |
| <b>496/1661 (30%)</b> | <b>302/1563 (19%)</b>  | 30%           | ( 19,43 )    |
| 281/496 (57%)         | 228/302 (75%)          | 71%           | ( 27,89 )    |
